# Supplementary material for: Oxygen-mediated enzymatic polymerization of thiol–ene hydrogels
Source: Royal Society of Chemistry journal article supplement (doi:10.1039/c3tb21794a), 2014-01-01
Supplement: c3tb21794a1.pdf [file c3tb21794a1.pdf]

## Electronic Supplementary Information

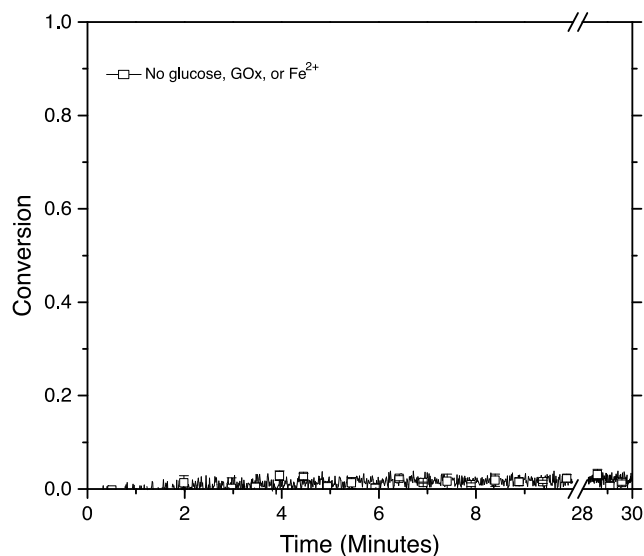

**Figure S1. Stability of the thiol-ene solution in 0.1 M MES buffer.** Allyl ether functional group conversion is shown for an aqueous thiol-ene solution in the absence of any components of the radical initiating systems and under aerobic conditions.

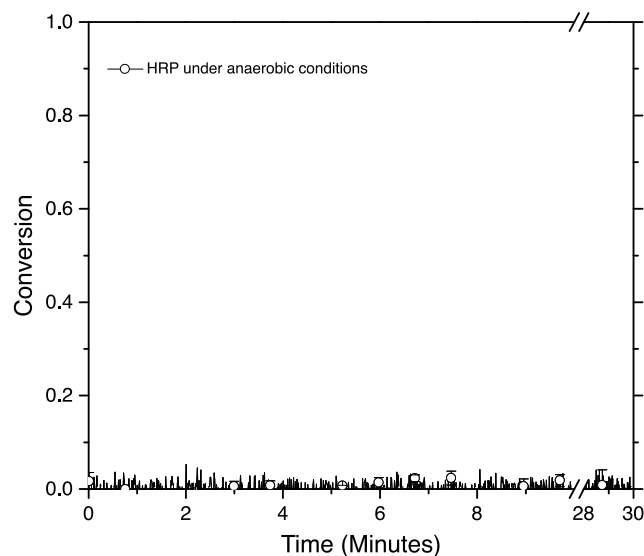

**Figure S3. Stability of the thiol-ene solution formulated with HRP.** Allyl ether functional group conversion is shown for an aqueous thiol-ene solution formulated with HRP (261 kU/L) under anaerobic conditions.

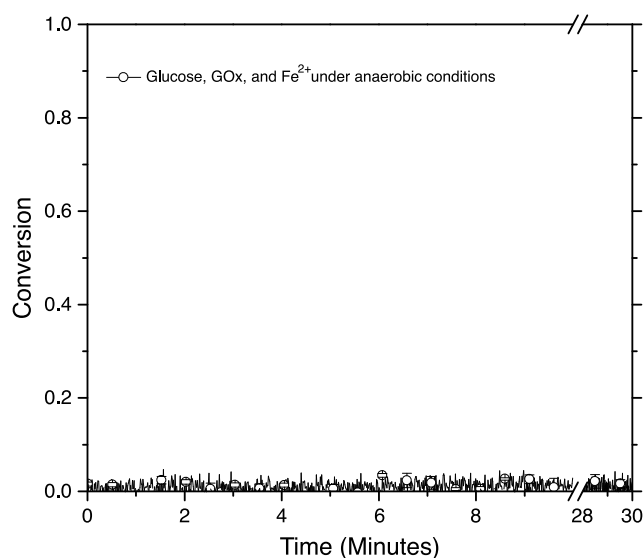

**Figure S2. Stability of the thiol-ene solution formulated with the GOx-glucose-Fe<sup>2+</sup> radical initiating system.** Allyl ether functional group conversion is shown for an aqueous thiol-ene solution formulated with glucose, Fe<sup>2+</sup>, and GOx (56 mM, 72 μM, and 14.8 kU/L, respectively) under anaerobic conditions.

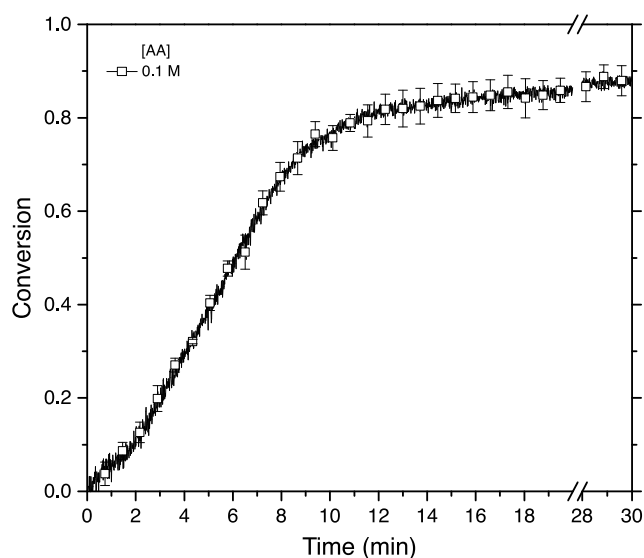

**Figure S4. Influence of acetylacetone on a coupled GOx-HRP initiated thiol-ene polymerization.** Allyl ether functional group conversion is shown for an aqueous thiol-ene solution formulated with glucose, GOx, HRP, and AA (56 mM, 14.8 kU/L, 261 kU/L and 0.1 M, respectively) upon exposure to air.
